# Supplementary figures and images for: Network-Based Logistic Classification with an EnhancedL1/2Solver Reveals Biomarker and Subnetwork Signatures for Diagnosing Lung Cancer
Source: Hindawi journal article supplement (doi:10.1155/2015/713953), 2015-01-01

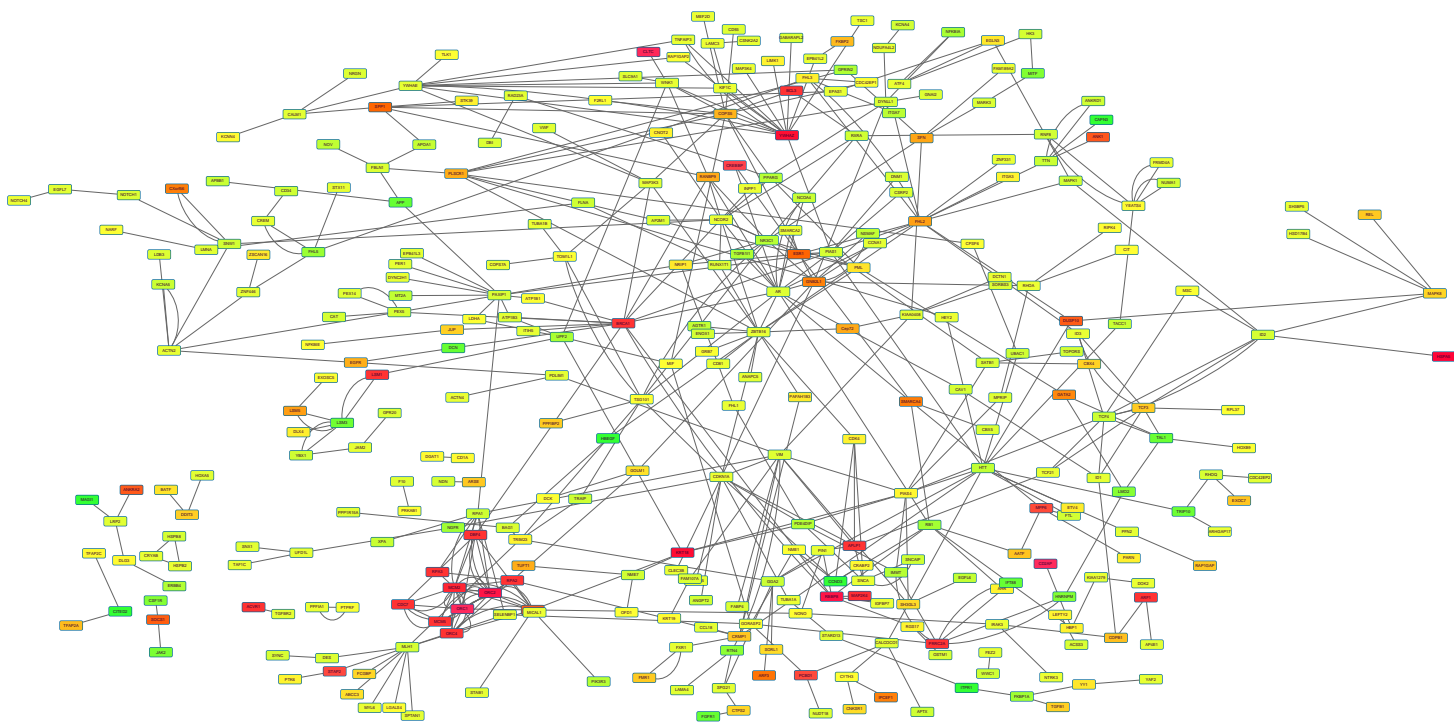

Supplement: f1 [file 713953.f1.zip]
